# Supplementary material for: Drug-induced chromatin accessibility changes associate with sensitivity to liver tumor promotion
Source: Life Sci Alliance. 2019 Oct 15;2(5):e201900461. doi: 10.26508/lsa.201900461 (PMC6795216; doi:10.26508/lsa.201900461)
Supplement: Supplementary file 3 [file LSA-2019-00461_TableS3.xlsx]

## Sheet: Fig2_DHS_shared_networks
	ngenes	ninteractions_observed	ninteractions_expected	pvalue	genes
Network 7	16	77	2	0*	Cyp2c55, Gsta2, Gstm3, Cyp2c37, Cyp2b10, Gstt3, Cyp2c29, Gstm7, Cyp2b13, Gstm2, Cyp2c66, Gpx5, Tyw1, Orm3, Pnliprp1, Cyp2c67
Network 11	20	56	10	0*	Stat3, Bmp7, Mycn, Furin, Gja1, Vegfa, Acvr1c, Tgfbr2, Acvr2a, Maf, Mstn, Large1, Gadd45b, Pax8, Gadd45g, Sox5, Ahr, Exog, Ifitm7, Smpd3
Network 3	41	132	62	1.26565e-14	Pten, Tns3, Pik3cb, Dlg5, Synj2, Tie1, Pik3c2a, Dusp16, Efcab9, Clcn3, Ptpn14, Fosl2, Nedd4l, Gna14, Itpr1, Plcl1, Park2, Scn8a, Lrrn3, Grm3, Kcnk5, Snx7, Slc9a9, Fig4, Kcnv2, Grin3a, Ikzf2, Tbc1d4, Snx16, Slc6a17, Arhgef10l, Pcdh9, Pepd, Zfp648, Srbd1, Htra1, Micall2, Cog6, Prok2, Slc24a5, Akirin1
Network 2	17	23	7	2.30952e-06	Uba2, Gsr, Srsf6, Tarsl2, Abcc4, Sfswap, Rarb, Rnps1, Atg4c, Atp8a1, Tmeff2, Zc3h4, Zmym4, Slc4a10, Sema6a, Akr1b8, Mboat1
				* pvalue below detection

## Sheet: Fig2_DHS_B6C3F1_enriched_net
	ngenes	ninteractions_observed	ninteractions_expected	pvalue	genes
Network 2	50	138	44	0*	Top2b, Furin, Slc22a29, Mbtps1, Abcc3, Aldh1a7, Enpep, Abcc4, Htra1, Csad, Cyp1a2, Amy2a5, Amy2b, Abcg1, Slc7a11, Serpina1a, Nln, Cdc42bpa, Ap1m1, Mme, Slc13a1, Slc9a9, Gzmk, Mthfr, Thnsl2, Cela2a, Gphn, Slc13a2, Osbp, Mfsd2a, Dpp9, Sorcs3, Dnajc1, Gk5, Tbc1d4, Tpmt, Farp1, Col16a1, Rimkla, Fam25c, Ppp1r3b, Sdk1, Tmprss7, Steap4, Phlda1, Ifngr1, 1700009N14Rik, Zfp706, A1bg, Adarb1
Network 4	60	288	51	0*	Klf4, Runx1, Gdf15, Dlx2, Msx1, Wnt16, Tcf7l2, Pbx1, Nr4a2, Bmp3, Pax8, Foxc1, Tle1, Ets1, Fzd8, Tgfbr2, Meis1, Gsc, Nr4a1, Ntrk2, Rbfox3, Slit3, Gadd45a, Sox5, Cux2, Foxn1, Fst, Jag1, Pknox2, Olig3, Btg2, Nfil3, Scarb1, Maf, Gpc6, Gadd45b, Gpc1, Reln, Kank1, Syt13, Tgfbr3, Grem2, Tmeff2, Erg, Bcor, Large1, Pdgfc, Mycl, Lama3, Nlk, Tfcp2l1, Pold3, Tmem45b, Cdh19, Rims1, Fam32a, Gas6, Ldlr, Spata1…
Network 6	98	514	298	0*	Src, Pten, Ank3, Pbk, Cetn3, Pde7b, Cdh1, Ctnna2, Parp1, Adcy5, Cdk19, Kdm4d, Sik1, Bptf, Utrn, Iqgap2, Pdp1, Zfp280d, Myo7a, Myo10, Plce1, Kdm2b, Lingo2, Kdm5c, Ankrd55, Pls1, Gtf3a, Klf9, Zfp770, Rab31, Zfp619, Dclk3, Lrrn3, Mapt, Hip1r, Pnpt1, Limd1, Zbtb8a, Glis1, Tlr4, Zbtb7c, Smok3a, Islr, Mical2, Prdm6, Gtpbp4, Pld1, Rarb, Ptpn9, Nt5e, Tln2, Morc3, Arhgef3, Cib3, Scgb1a1, Add2, Ptpn3, Inf2…
Network 17	14	41	1	0*	Sqle, Aox1, Aldh4a1, Cyp2b10, Ces2c, Cyp2a5, Ugt1a2, Cyp2c29, Ddah1, Cyp7b1, Sult1c2, Cyp2f2, Snx16, Cyp2c67
				* pvalue below detection

## Sheet: Fig2_DHS_C57BL6J_enriched_net
	ngenes	ninteractions_observed	ninteractions_expected	pvalue	genes
Network 2	18	26	2	0*	Gpam, Serpinb1a, Rhbdf1, Smpd3, Elovl1, Sult3a1, Acot11, Fabp5, Bdh1, Hs3st3b1, Slc26a6, Tgm3, Slc22a12, Gypc, Hbq1a, Pla2r1, Ano6, Dera
Network 3	94	581	379	0*	Oasl1, Oasl2, Pten, Ehmt1, Actrt2, Trib3, Hnrnpa3, Herc3, Arl4a, Tie1, Pip4k2a, Wsb1, Rrm2, Zbtb18, Hnrnpab, Akap13, Wwox, Fosl2, Zbtb8a, Glis1, Abcc4, Hivep1, Cdyl, Arid2, Zfp184, Tspyl4, Hk2, Stk4, Nedd4l, Ppm1l, Fig4, Podn, Lrrc4, Hist1h2br, Lingo2, Atp2b1, Cd180, Rab6b, Tox3, Lrp2bp, Ddx47, Srbd1, Tbc1d14, Tbc1d4, Rabgap1l, Usp48, Fry, Pja1, Tox2, Tmpo, Api5, Ubxn2b, Pepd, Mtr, Ect2, Mapkap1,…
Network 9	18	44	5	0*	Bmp7, Egr1, Cdkn1c, Pbx1, Tle1, Epas1, Tgfbr2, Rarb, Pax9, Bmp10, Nr2e3, Tff1, Pdgfc, Nfil3, Prcp, Acpp, Tmeff2, Grb10
Network 12	23	66	5	0*	Chrm3, Gna14, Gng2, P2ry1, Avpr1a, P2ry2, Kalrn, Trh, Kcnj3, Grm3, Vipr1, Adcyap1r1, Cacna1d, Fgf12, Vwf, Pcdh20, Rgs3, Gap43, Adamtsl1, Agrn, Scgb1a1, Pkd2, Pappa2
Network 14	22	48	5	0*	Ctnna1, Vcl, Sptbn1, Utrn, Cdh4, Mylk, Svil, Tpm1, Trpc7, Ntrk3, Fat1, Cabin1, Prkd1, Tfcp2l1, Clstn2, Micall2, Robo1, Dmbt1, Celf4, Mast4, Ctif, Dpf3
Network 22	11	28	1	0*	Cyp3a11, Cyp2c37, Gstm1, Por, Cyp2b10, Cyp2d9, Gstm4, Cyp2s1, Cyp2c50, Hsd17b13, Ttc39a
				* pvalue below detection

## Sheet: Fig3_RNA_shared_networks
	ngenes	ninteractions_observed	ninteractions_expected	pvalue	genes
Network 3	46	445	19	0*	Cyp1a2, Cyp2b13, Cyp3a11, Cyp2c37, Cyp2b10, Cyp2b9, Cyp2c54, Ugt2b34, Ugt1a1, Cyp2c55, Abcc3, Cyp2c29, Gstm1, Aldh1a1, Gstt3, Ugt2b35, Ugt1a9, Gsta1, Gsta4, Gstm3, Cyp2c65, Ces2a, Cyp2c66, Sult3a1, Gstm4, Cyp2c50, Ces2c, Sult1c2, Cyp2a5, Ces1d, Por, Sult1e1, Abcc4, BC089597, Cyp2d12, Pla2g12a, Slc22a26, Slc10a2, Slc28a1, Fam19a2, Dio1, Rsph4a, Ifi27l2b, Adam11, Tmeff2, Inf2
				* pvalue below detection

## Sheet: Fig3_RNA_B6C3F1_enriched_net
	ngenes	ninteractions_observed	ninteractions_expected	pvalue	genes
Network 3	18	38	2	0*	Cyb5a, Cyp2c38, Cyp2c39, Slco1a4, Cyp2c40, Sult1d1, Cyp2d40, Cyp2g1, Cyp2c68, Ahr, Sgpl1, Elovl1, Acnat2, Acss3, Cyp2c69, Inmt, Nat8, Srxn1
Network 4	22	35	6	1.88738e-15	Cdh1, Tgfbr2, Gdf15, Pmm1, Nt5e, Adssl1, Reck, Lamb3, Sar1b, Gpc1, Col15a1, Wif1, Gnpda1, Nt5c3b, Tmc5, Cdk5r1, Serinc2, Reep1, 6430573F11Rik, Tmem51, Rbp1, Atp10a
Network 2	42	105	51	5.29697e-11	Src, Oasl1, Ank3, Ncald, Krt18, Tuba8, Cdkn2c, Scn8a, Papss2, Podn, Scn5a, Akr1b7, Klf9, Prom1, Cib3, Fkbp11, Plscr1, Gm13247, Ar, Unc13b, Dclk3, Folh1, Efna3, Serpina7, Trim14, Mycn, Neb, Fam46c, Rapgef4, Cyp2c67, Syt3, Dlgap1, Tmem189, Fam84a, Ppp1r42, Errfi1, 2200002D01Rik, Cd19, Fam110c, Cobl, Btnl9, Ttc39a
				* pvalue below detection

## Sheet: Fig3_RNA_C57BL6J_enriched_net
	ngenes	ninteractions_observed	ninteractions_expected	pvalue	genes
Network 4	4	3	1	0.0874445	Arhgef7, Limk1, Robo1, Myo9a
