# Supplementary material for: Drug-induced chromatin accessibility changes associate with sensitivity to liver tumor promotion
Source: Life Sci Alliance. 2019 Oct 15;2(5):e201900461. doi: 10.26508/lsa.201900461 (PMC6795216; doi:10.26508/lsa.201900461)
Supplement: Supplementary file 6 [file LSA-2019-00461_TableS6.xlsx]

## Sheet: S2_DHS QC
sample	nr_fragments	nr_filtered_fragments	avg_fragment_size
C57BL6_Veh_1021	92010386	62037467	105
C57BL6_Veh_1022	64369168	47966374	105
C57BL6_Veh_1023	130959624	94968250	103
C57BL6_Veh_1025	46297822	34037344	105
C57BL6_PB_2021	52501526	39137202	105
C57BL6_PB_2022	89524226	60689486	105
C57BL6_PB_2023	95269662	58692271	105
C57BL6_PB_2024	75824042	53442912	105
C57BL6_PB_2025	47495158	36191531	105
B6C3F1_Veh_1031	152889436	40975140	98
B6C3F1_Veh_1032	80308142	20359810	102
B6C3F1_Veh_1033	39176480	15564152	108
B6C3F1_Veh_1035	94090250	34300259	101
B6C3F1_PB_2031	83011374	24643350	112
B6C3F1_PB_2032	124115482	34424584	104
B6C3F1_PB_2033	111765550	33380209	103
B6C3F1_PB_2034	114549002	36875061	101
B6C3F1_PB_2035	75903528	29136163	109
